# Supplementary material for: Electrochemical oxidation of boron-doped nickel–iron layered double hydroxide for facile charge transfer in oxygen evolution electrocatalysts
Source: Royal Society of Chemistry journal article supplement (doi:10.1039/d0ra10169a), 2021-01-01
Supplement: d0ra10169a1.pdf [file d0ra10169a1.pdf]

Electronic supplementary Information (ESI †) for

# Electrochemical Oxidation of Boron-Doped Nickel-Iron Layered Double Hydroxide for Facile Charge Transfer in Oxygen Evolution Electrocatalysts

In-Kyoung Ahn<sup>a</sup>, So-Yeon Lee<sup>a</sup>, Hyoung Gyun Kim<sup>a</sup>, Gi-Baek Lee<sup>a</sup>, Ji-Hoon Lee<sup>b</sup>, Miyoung Kim<sup>a</sup>, and Young-Chang Joo<sup>\*a,c,d</sup>

<sup>a</sup>*Department of Materials Science & Engineering, Seoul National University, Seoul 08826, Republic of Korea*

<sup>b</sup>*Materials Center for Energy Convergence, Surface Technology Division, Korea Institute of Materials Science (KIMS), Changwon, Gyeongnam 51508, Republic of Korea*

<sup>c</sup>*Research Institute of Advanced Materials (RIAM), Seoul National University, Seoul 08826, Republic of Korea*

<sup>d</sup>*Advanced Institute of Convergence Technology, 145 Gwanggyo-ro, Yeongtong-gu, Suwon 16229, Republic of Korea*

**\*Corresponding authors:**

**Young-Chang Joo**

**E-mail: [ycjoo@snu.ac.kr](mailto:ycjoo@snu.ac.kr), Tel: +82-2-880-8986, Fax: +82-2-883-8197**

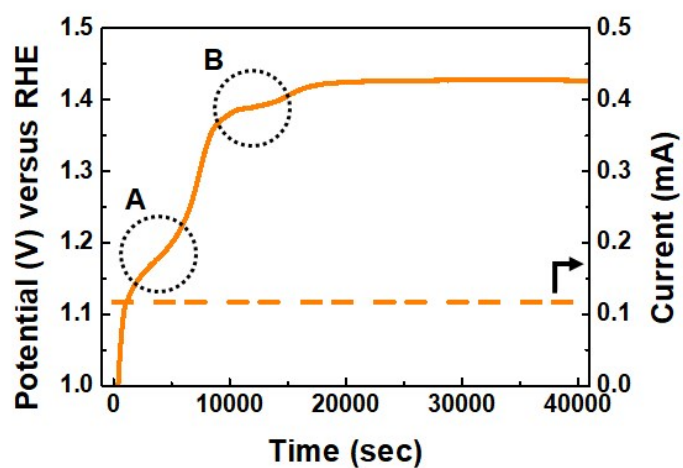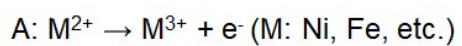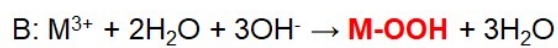

**Fig. S1** The potential profile of the galox-B:NiFe LDH during galvanostatic oxidation at  $0.1 \text{ mA cm}^{-2}$  over 12 hours. Observation of two plateaus during oxidation<sup>S18</sup>.

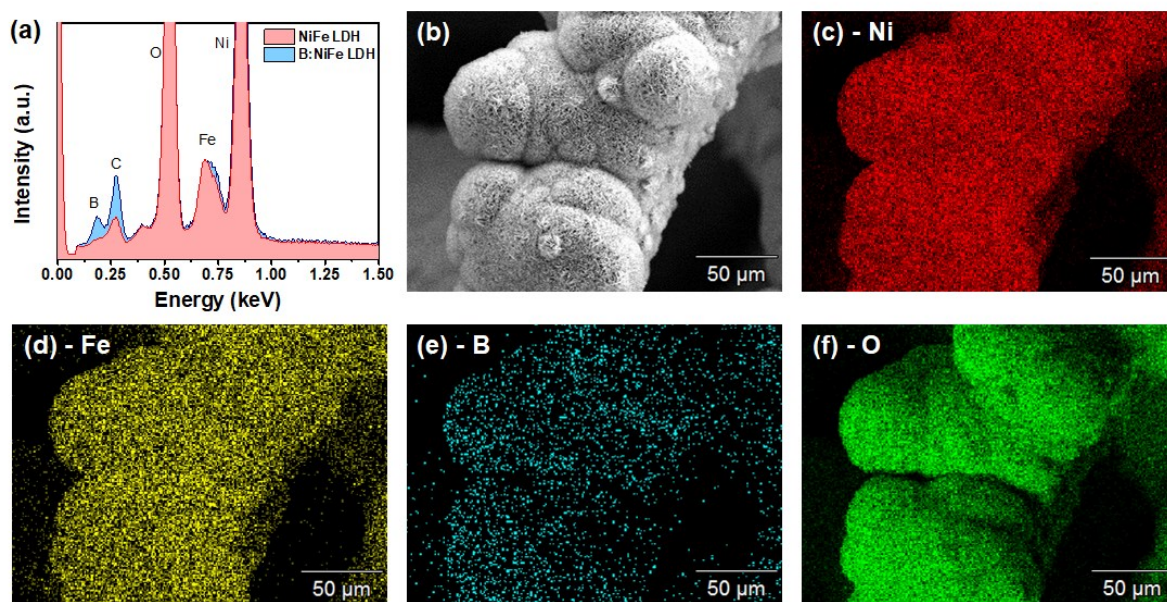

**Fig. S2** Morphological characterization of B:NiFe LDH. (a) Energy dispersive X-ray spectrometry (EDS) spectrum. (b) EDS scanning image. (c-f) EDS elemental mapping images of B:NiFe LDH. (c) Ni. (d) Fe. (e) B, (f) O.

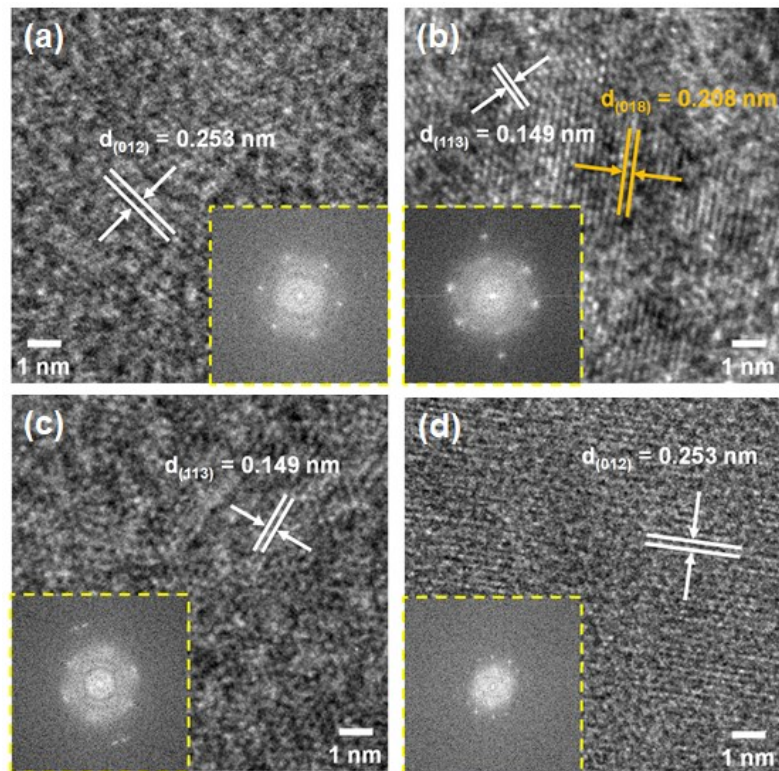

**Fig. S3** Microstructural characterization of NiFe LDH based electrocatalysts. HR-TEM and FFT analysis (inset) of (a) NiFe LDH, (b) B:NiFe LDH, (c) B:NiFe LDH after OER sweep, and (d) galox-B:NiFe LDH.

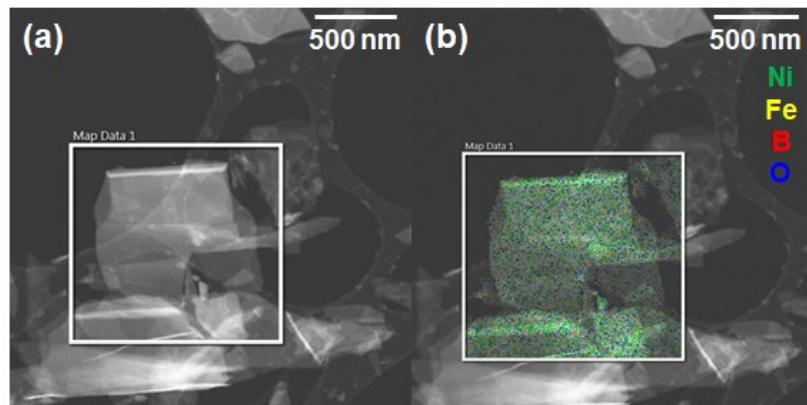

**Fig. S4** EDS of TEM analysis of B:NiFe LDH. (a) STEM image. (b) Mixed EDS layered image of STEM, Ni, Fe, B, and O composition.

**Table S1.** ICP-AES analysis for verification of chemical composition of NiFe LDH base electrocatalysts

| <b>Sample</b>           | <b>Ni (ppm)</b>   | <b>B (ppm)</b> | <b>Ni : B ratio</b>              |
|-------------------------|-------------------|----------------|----------------------------------|
| <b>NiFe LDH</b>         | $7.5 \times 10^3$ | 0              | <b>1 : 0</b>                     |
| <b>B:NiFe LDH</b>       | $7.9 \times 10^3$ | 18.8           | <b>1 : 0.013</b>                 |
| <b>Galox-B:NiFe LDH</b> | $9.0 \times 10^3$ | 0.25           | <b>1 : 0.1 x 10<sup>-3</sup></b> |

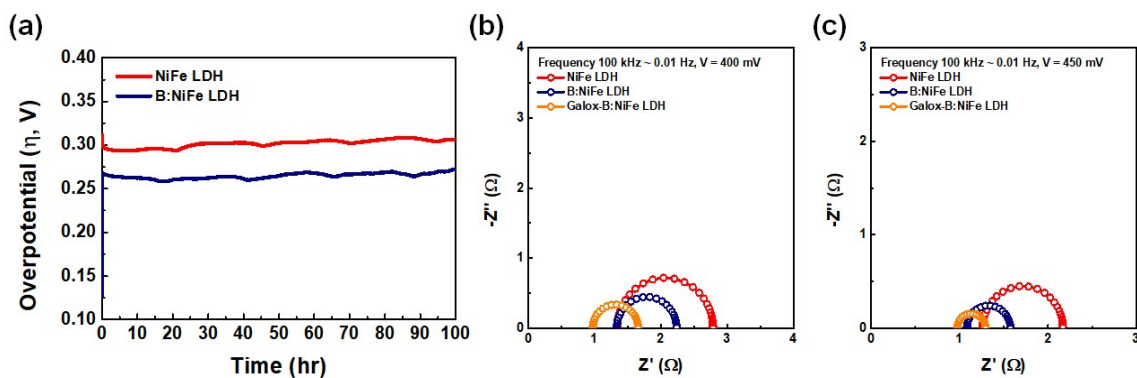

**Fig. S5** Electrochemical characterization of NiFe LDH based electrocatalysts in 1.0 M KOH. (a) Chronopotentiometric stability test of NiFe LDH and B:NiFe LDH at constant current density  $10 \text{ mA cm}^{-2}$ . Nyquist plots at (b) 400 mV (vs. RHE) and (c) 450 mV (vs. RHE) for different electrodes.

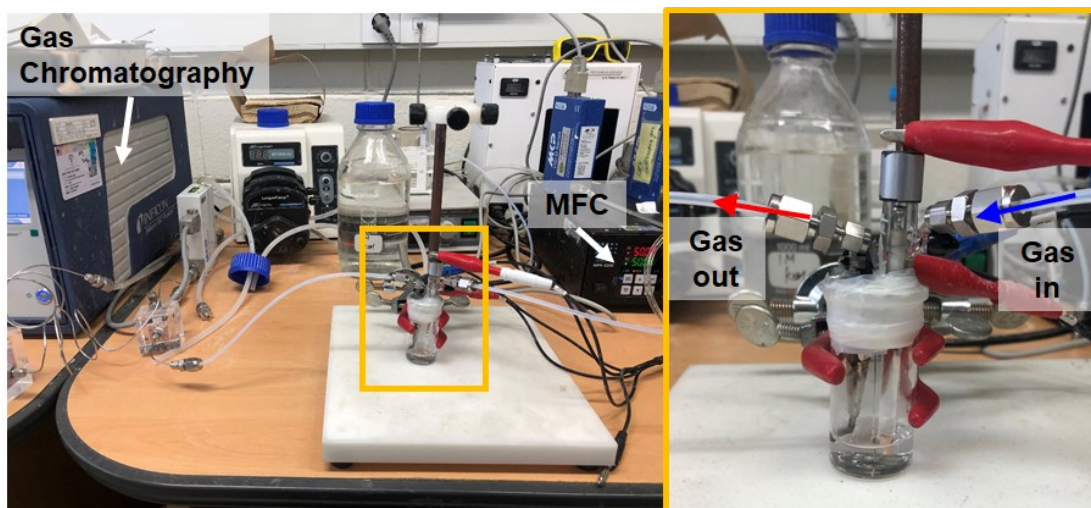

$$FE (\%) = \frac{Z \cdot n \cdot F}{Q}$$

Z: number of electrons for 1 mol gas

n: number of moles

F: Faraday constant, 96,500 C mol<sup>-1</sup>

Q: passed charge

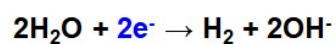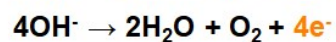

**Fig. S6** Images of equipment of evolved gas analysis during stability test. The equation of bottom of images: calculation of Faradaic efficiency.



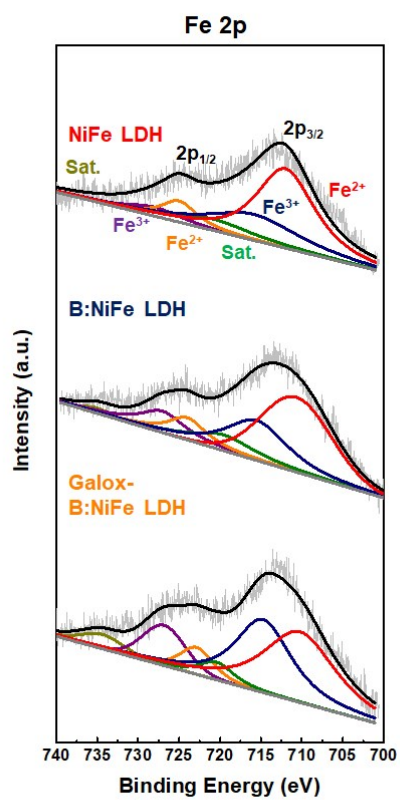

**Fig. S7** XPS analysis for observation of Fe 2p of NiFe LDH based electrocatalysts under each condition.

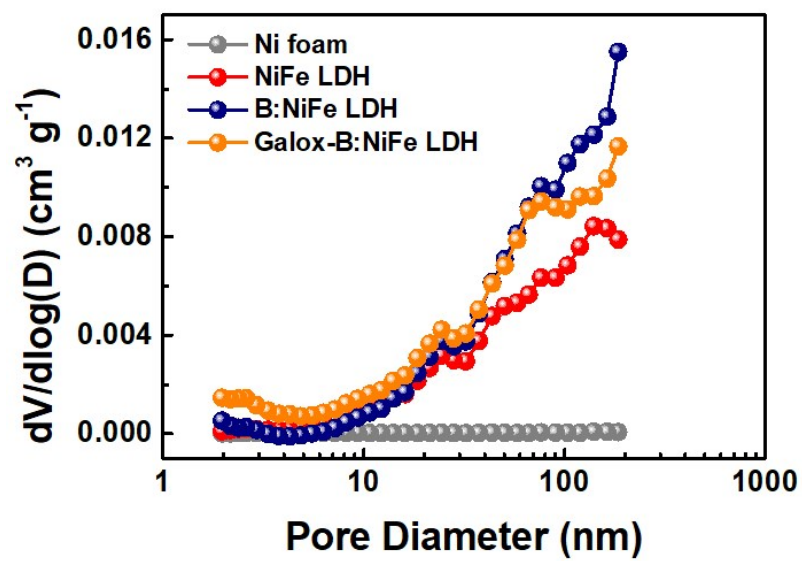

**Fig. S8** Physically porosity characterization of pore diameter distribution of NiFe LDH based electrocatalysts.

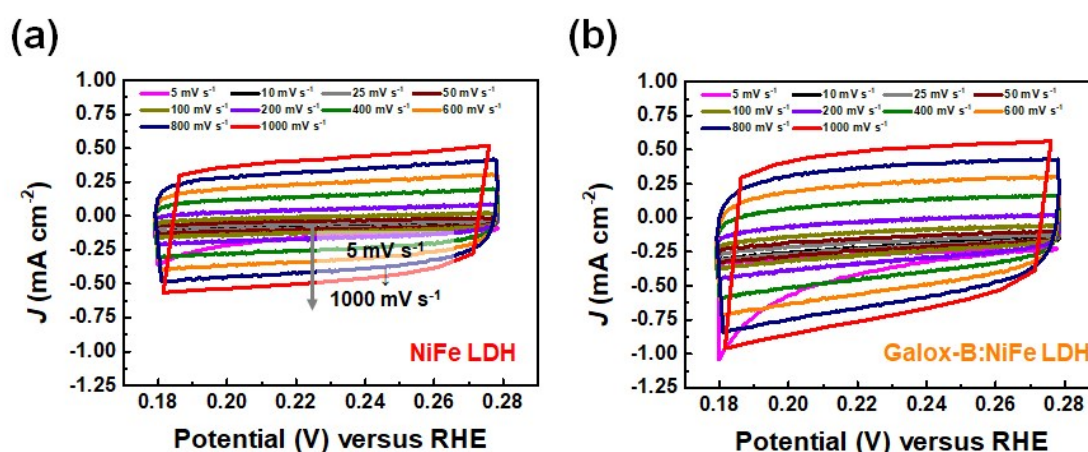

**Fig. S9** Cyclic voltammogram for measurement of ECSA of (a) NiFe LDH and (b) galox-B:NiFe LDH.

The cyclic voltammetry (CV) was performed in the voltage range between 0.18 and 0.28 V (vs. RHE, non-Faradaic range). The linear slope was calculated by plotting  $\Delta J$  at 0.23 V (vs. RHE) depending on scan rates. The double-layer capacitance ( $C_{dl}$ ) was calculated through the  $1/2$  of linear slope value<sup>S1,S2,S4,S6</sup>.

$\Delta J = J_a - J_c$ ,  $C_{dl}$  can be calculated following equation:

$$C_{dl} = 1/2 \times d(\Delta J)/dv$$

The ECSA can be calculated following equation<sup>S3-S6</sup>:

$ECSA = C_{dl}/C_s$ ,  $C_s$ : The capacitance of atomically smooth planar surface in 1.0 M KOH electrolyte ranges between 20 to 60  $\mu F cm^{-2}$  <sup>S3-S5</sup>. For calculation,  $C_s$  was configured at 40  $\mu F cm^{-2}$  <sup>S3,S5</sup>.

| Electrocatalysts            | Slope            | $C_{dl}$          | ECSA                |
|-----------------------------|------------------|-------------------|---------------------|
| NiFe LDH on Ni foam         | 0.9 mF $cm^{-2}$ | 0.45 mF $cm^{-2}$ | 11.25 $cm^2_{ECSA}$ |
| Galox-B:NiFe LDH on Ni foam | 1.3 mF $cm^{-2}$ | 0.65 mF $cm^{-2}$ | 16.25 $cm^2_{ECSA}$ |

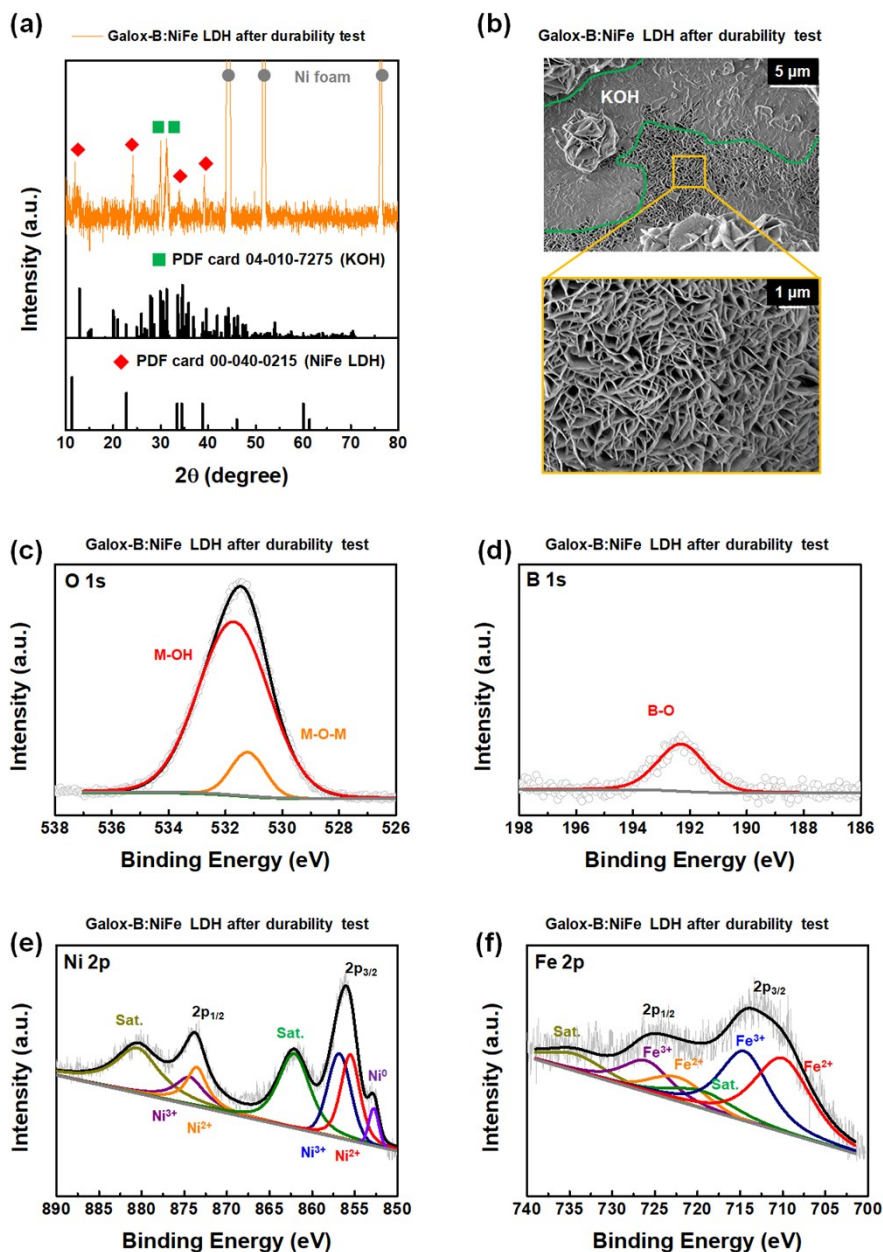

**Fig. S10** Structural, morphological, and chemical characterization of galox-B:NiFe LDH electrode after OER stability test. (a) XRD analysis for observation of phase of galox-B:NiFe LDH after 100 hours OER stability test. (b) FE-SEM image of low magnification (top) and high magnification (bottom) of the galox-B:NiFe LDH. (c-f) XPS analysis. (c) oxygen 1s, (d) boron 1s, (e) nickel 2p, and (f) iron 2p spectrum.

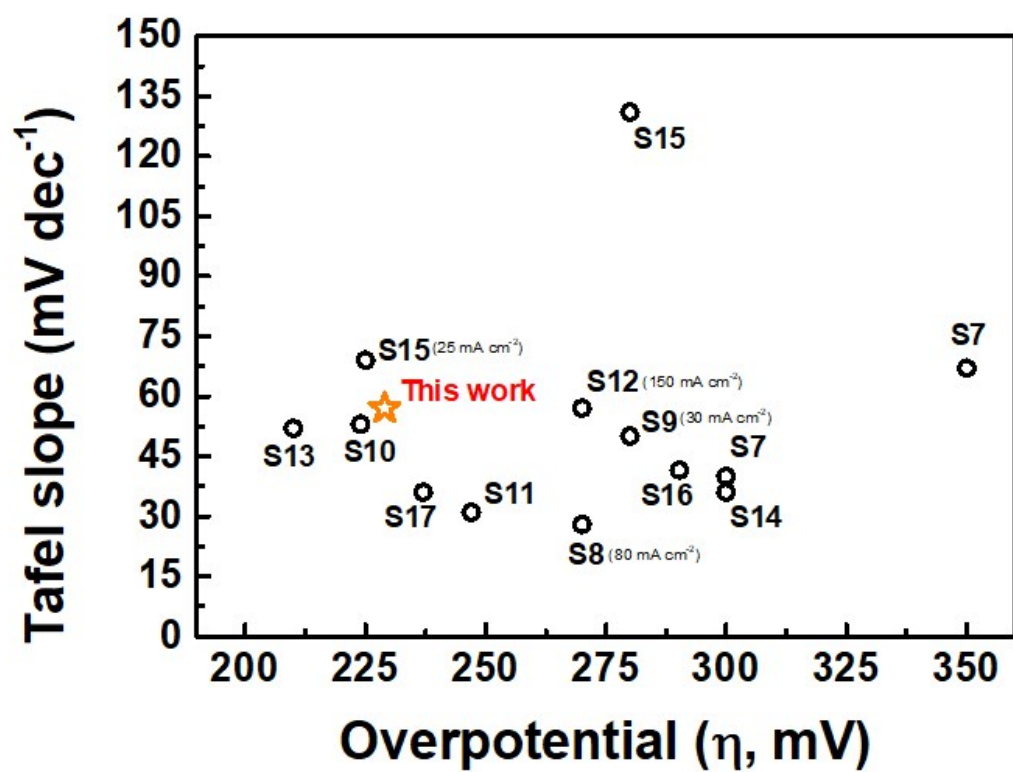

**Fig. S11** Comparison of OER electrocatalytic activity at  $10 \text{ mA cm}^{-2}$  with previous reports of transition metal LDH based electrocatalysts (X-axis: overpotential, Y-axis: Tafel slope).

## References

- S1. Xu, X.; Song, F.; Hu, X., A nickel iron diselenide-derived efficient oxygen-evolution catalyst. *Nat Commun* **2016**, *7*, 12324.
- S2. Deng, H.; Zhang, C.; Xie, Y.; Tumlin, T.; Giri, L.; Karna, S. P.; Lin, J., Laser induced MoS<sub>2</sub>/carbon hybrids for hydrogen evolution reaction catalysts. *Journal of Materials Chemistry A* **2016**, *4* (18), 6824-6830.
- S3. Wang, D.; Wang, J.; Luo, X.; Wu, Z.; Ye, L., In Situ Preparation of Mo<sub>2</sub>C Nanoparticles Embedded in Ketjenblack Carbon as Highly Efficient Electrocatalysts for Hydrogen Evolution. *ACS Sustainable Chemistry & Engineering* **2017**, *6* (1), 983-990.
- S4. Benck, J. D.; Chen, Z.; Kuritzky, L. Y.; Forman, A. J.; Jaramillo, T. F., Amorphous Molybdenum Sulfide Catalysts for Electrochemical Hydrogen Production: Insights into the Origin of their Catalytic Activity. *ACS Catalysis* **2012**, *2* (9), 1916-1923.
- S5. McCrory, C. C.; Jung, S.; Ferrer, I. M.; Chatman, S. M.; Peters, J. C.; Jaramillo, T. F., Benchmarking hydrogen evolving reaction and oxygen evolving reaction electrocatalysts for solar water splitting devices. *J Am Chem Soc* **2015**, *137* (13), 4347-57.
- S6. Ahn, I. K.; Joo, W.; Lee, J. H.; Kim, H. G.; Lee, S. Y.; Jung, Y.; Kim, J. Y.; Lee, G. B.; Kim, M.; Joo, Y. C., Metal-organic Framework-driven Porous Cobalt Disulfide Nanoparticles Fabricated by Gaseous Sulfurization as Bifunctional Electrocatalysts for Overall Water Splitting. *Sci Rep* **2019**, *9* (1), 19539.
- S7. Song, F.; Hu, X., Exfoliation of layered double hydroxides for enhanced oxygen evolution catalysis. *Nat Commun* **2014**, *5*, 4477.
- S8. Lu, X.; Zhao, C., Electrodeposition of hierarchically structured three-dimensional nickel-iron electrodes for efficient oxygen evolution at high current densities. *Nat Commun* **2015**, *6*, 6616.
- S9. Lu, Z.; Xu, W.; Zhu, W.; Yang, Q.; Lei, X.; Liu, J.; Li, Y.; Sun, X.; Duan, X., Three-dimensional NiFe layered double hydroxide film for high-efficiency oxygen evolution reaction. *Chem Commun (Camb)* **2014**, *50* (49), 6479-82.
- S10. Li, Z.; Shao, M.; An, H.; Wang, Z.; Xu, S.; Wei, M.; Evans, D. G.; Duan, X., Fast electrosynthesis of Fe-containing layered double hydroxide arrays toward highly efficient electrocatalytic oxidation reactions. *Chem Sci* **2015**, *6* (11), 6624-6631.
- S11. Gong, M.; Li, Y.; Wang, H.; Liang, Y.; Wu, J. Z.; Zhou, J.; Wang, J.; Regier, T.; Wei, F.; Dai, H., An advanced Ni-Fe layered double hydroxide electrocatalyst for water oxidation.

*J Am Chem Soc* **2013**, *135* (23), 8452-5.

- S12. Hou, Y.; Lohe, M. R.; Zhang, J.; Liu, S.; Zhuang, X.; Feng, X., Vertically oriented cobalt selenide/NiFe layered-double-hydroxide nanosheets supported on exfoliated graphene foil: an efficient 3D electrode for overall water splitting. *Energy & Environmental Science* **2016**, *9* (2), 478-483.
- S13. Jia, Y.; Zhang, L.; Gao, G.; Chen, H.; Wang, B.; Zhou, J.; Soo, M. T.; Hong, M.; Yan, X.; Qian, G.; Zou, J.; Du, A.; Yao, X., A Heterostructure Coupling of Exfoliated Ni-Fe Hydroxide Nanosheet and Defective Graphene as a Bifunctional Electrocatalyst for Overall Water Splitting. *Adv Mater* **2017**, *29* (17).
- S14. Dang, L.; Liang, H.; Zhuo, J.; Lamb, B. K.; Sheng, H.; Yang, Y.; Jin, S., Direct Synthesis and Anion Exchange of Noncarbonate-Intercalated NiFe-Layered Double Hydroxides and the Influence on Electrocatalysis. *Chemistry of Materials* **2018**, *30* (13), 4321-4330.
- S15. Yang, Y.; Dang, L.; Shearer, M. J.; Sheng, H.; Li, W.; Chen, J.; Xiao, P.; Zhang, Y.; Hamers, R. J.; Jin, S., Highly Active Trimetallic NiFeCr Layered Double Hydroxide Electrocatalysts for Oxygen Evolution Reaction. *Advanced Energy Materials* **2018**, *8* (15), 1703189.
- S16. Xue, X.; Yu, F.; Peng, B.; Wang, G.; Lv, Y.; Chen, L.; Yao, Y.; Dai, B.; Shi, Y.; Guo, X., One-step synthesis of nickel-iron layered double hydroxides with tungstate acid anions via flash nano-precipitation for the oxygen evolution reaction. *Sustainable Energy & Fuels* **2019**, *3* (1), 237-244.
- S17. Zhang, J.; Liu, J.; Xi, L.; Yu, Y.; Chen, N.; Sun, S.; Wang, W.; Lange, K. M.; Zhang, B., Single-Atom Au/NiFe Layered Double Hydroxide Electrocatalyst: Probing the Origin of Activity for Oxygen Evolution Reaction. *J Am Chem Soc* **2018**, *140* (11), 3876-3879.
- S18. Lee, J.-H.; Yang, T.-Y.; Kang, H.-Y.; Nam, D.-H.; Kim, N.-R.; Lee, Y.-Y.; Lee, S.-H.; Joo, Y.-C., Designing thermal and electrochemical oxidation processes for  $\delta$ -MnO<sub>2</sub> nanofibers for high-performance electrochemical capacitors. *Journal of Materials Chemistry A* **2014**, *2* (20), 7197-7204.
